# Supplementary material
Source: PubMed Central journal article supplement (PMC5860988)
Supplement: NIHMS938009-supplement-1.pdf [file NIHMS938009-supplement-1.pdf]

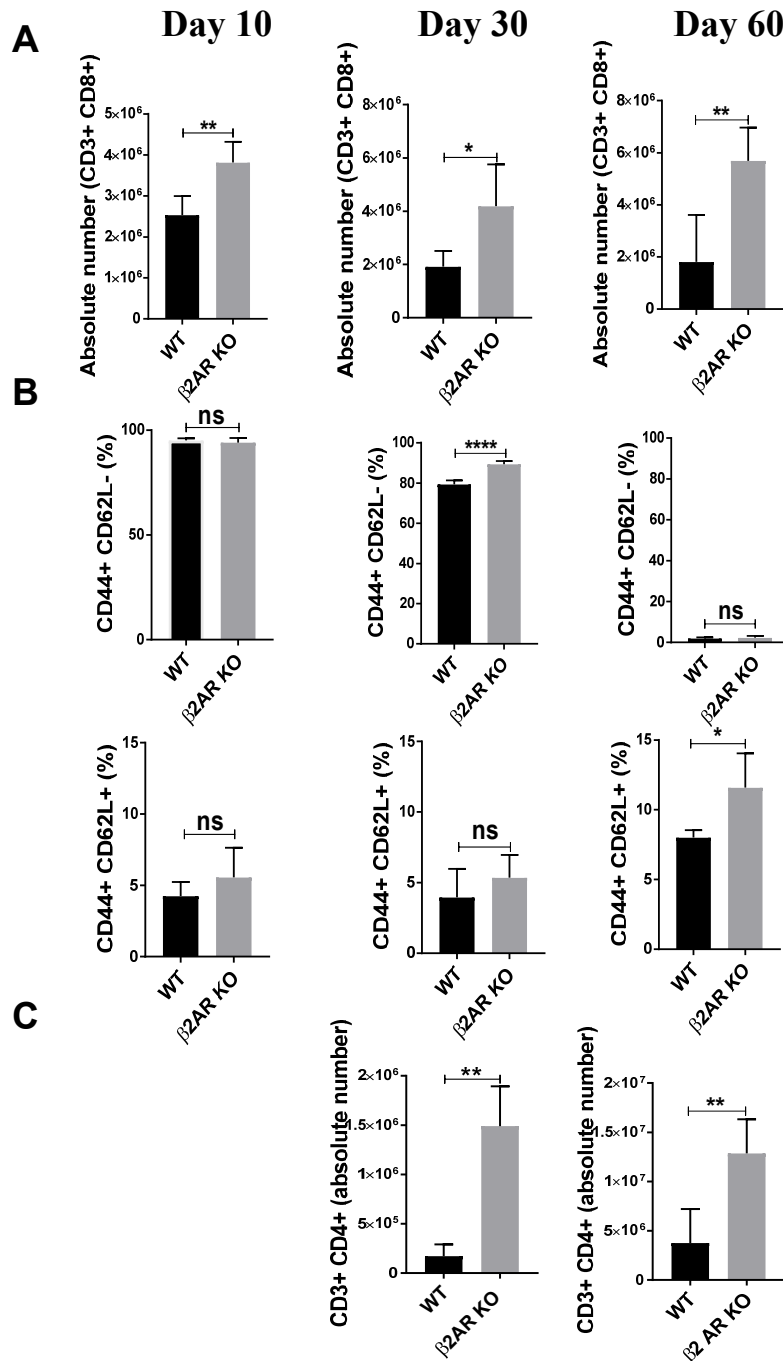

**Supplemental Figure 1. CD8<sup>+</sup> and CD4<sup>+</sup> T cell numbers and effector/memory phenotype in different time points after allo-HCT.** At day -1, BALB/cJ WT or β2AR KO host mice were irradiated with 900 cGy. At day 0 host mice were transplanted with 3×10<sup>6</sup> TCD-BM and 0.3×10<sup>6</sup> CD8<sup>+</sup> T cells purified from C57BL/6J mice after 0.1×10<sup>6</sup> A20 injection (*n*=5). CD8<sup>+</sup> T cell absolute numbers (A), effector CD8<sup>+</sup> T cells marked CD44<sup>+</sup>CD62L<sup>-</sup> and memory T cells marked with CD44<sup>+</sup>CD62L<sup>+</sup> (B) and reconstituted CD4<sup>+</sup> T cells (C) at day 10, day 30 and day 60 after transplantation. Data are presented as mean ± SD. \*\*\*\* P<0.0001; \*\* P<0.01; \*P<0.05.

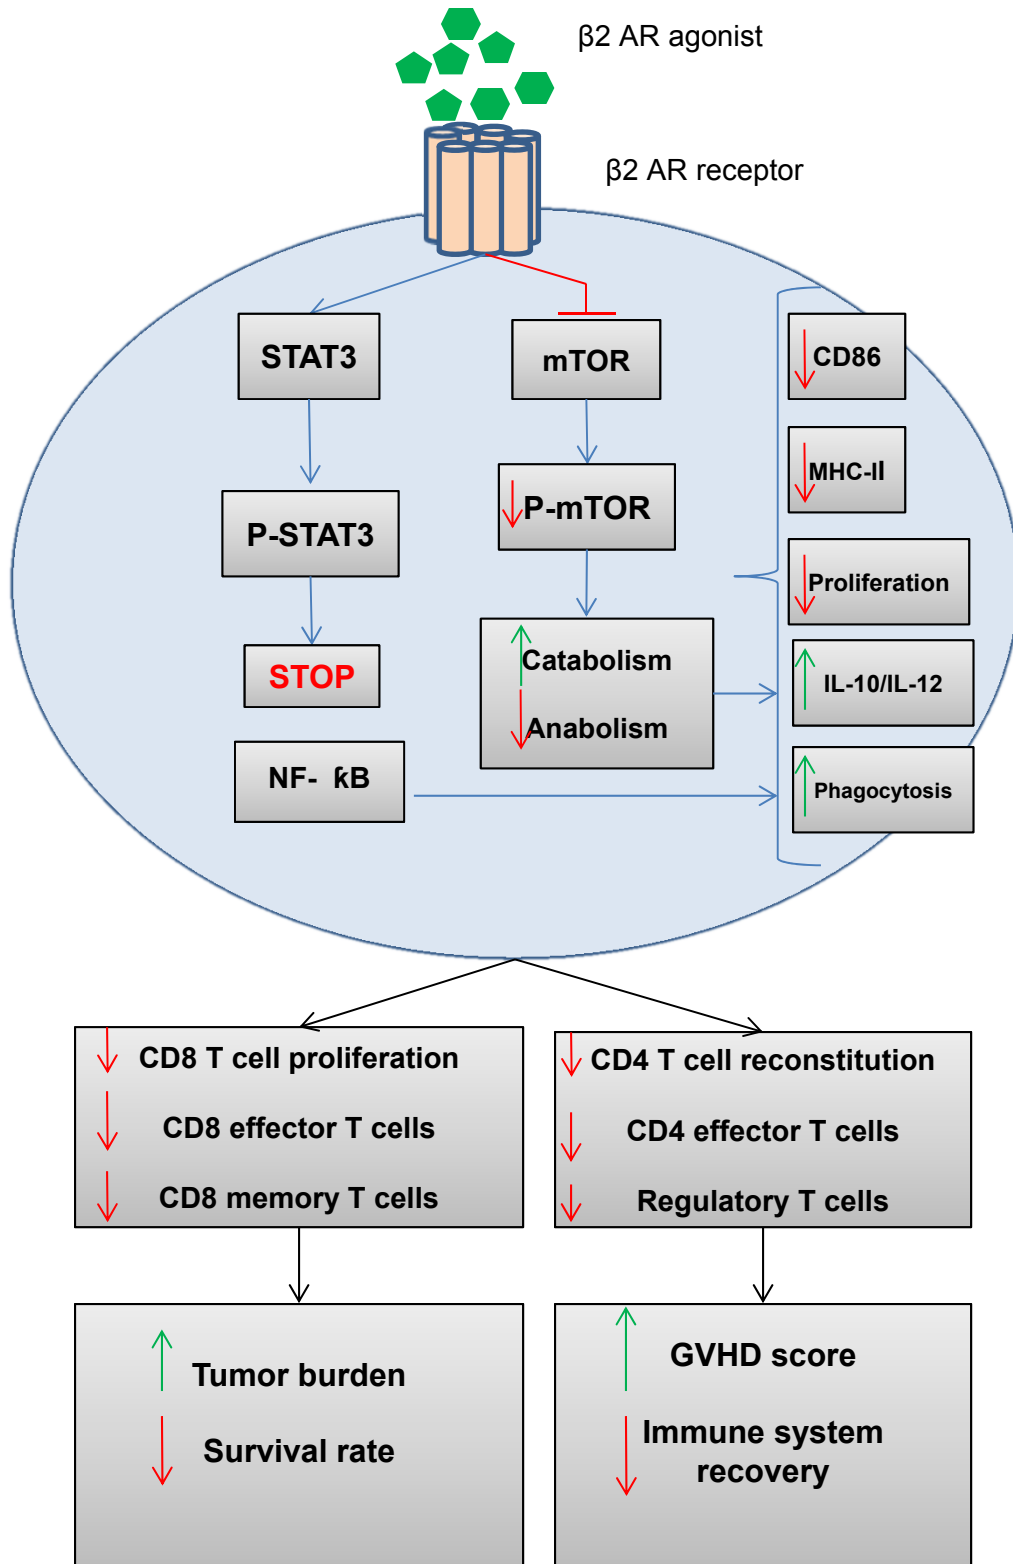

Supplemental Figure 2. Schematic diagram of  $\beta_2$ ADR signaling in DCs and subsequent effects on GVT and GVHD.
